# Supplementary material
Source: publisher figshare collection journal article supplement (https://acs.figshare.com/ndownloader/files/4669423)
Supplement: Supplementary file 1 [file 4669423]

 
data_pAnTpm 
 
_audit_creation_method            SHELXL-97 
_chemical_name_systematic 
; 
 ? 
; 
_chemical_name_common             ? 
_chemical_melting_point           ? 
_chemical_formula_moiety          ? 
_chemical_formula_sum 
 'C16 H15 N7' 
_chemical_formula_weight          305.35 
 
loop_ 
 _atom_type_symbol 
 _atom_type_description 
 _atom_type_scat_dispersion_real 
 _atom_type_scat_dispersion_imag 
 _atom_type_scat_source 
 'C'  'C'   0.0181   0.0091 
 'International Tables Vol C Tables 4.2.6.8 and 6.1.1.4' 
 'H'  'H'   0.0000   0.0000 
 'International Tables Vol C Tables 4.2.6.8 and 6.1.1.4' 
 'N'  'N'   0.0311   0.0180 
 'International Tables Vol C Tables 4.2.6.8 and 6.1.1.4' 
 
_symmetry_cell_setting            triclinic 
_symmetry_space_group_name_H-M    'P -1'
 
loop_ 
 _symmetry_equiv_pos_as_xyz 
 'x, y, z' 
 '-x, -y, -z' 
 
_cell_length_a                    9.32330(10) 
_cell_length_b                    12.39170(10) 
_cell_length_c                    13.56350(10) 
_cell_angle_alpha                 71.7240(10) 
_cell_angle_beta                  88.5350(10) 
_cell_angle_gamma                 85.6060(10) 
_cell_volume                      1483.59(2) 
_cell_formula_units_Z             4 
_cell_measurement_temperature     100(2) 
_cell_measurement_reflns_used     8458 
_cell_measurement_theta_min       3
_cell_measurement_theta_max       66 
 
_exptl_crystal_description        'block' 
_exptl_crystal_colour             'colorless'
_exptl_crystal_size_max           0.31 
_exptl_crystal_size_mid           0.17 
_exptl_crystal_size_min           0.14 
_exptl_crystal_density_meas       ? 
_exptl_crystal_density_diffrn     1.367 
_exptl_crystal_density_method     'not measured' 
_exptl_crystal_F_000              640 
_exptl_absorpt_coefficient_mu     0.717 
_exptl_absorpt_correction_type    multi-scan 
_exptl_absorpt_correction_T_min   0.8083 
_exptl_absorpt_correction_T_max   0.9063 
_exptl_absorpt_process_details    ? 
 
_exptl_special_details 
; 
 ? 
; 
 
_diffrn_ambient_temperature       100(2) 
_diffrn_radiation_wavelength      1.54178 
_diffrn_radiation_type            CuK\a 
_diffrn_radiation_source          'fine-focus sealed tube' 
_diffrn_radiation_monochromator   graphite 
_diffrn_measurement_device_type   'Bruker APEX2 CCD detector' 
_diffrn_measurement_method        '\w scans' 
_diffrn_detector_area_resol_mean  ? 
_diffrn_standards_number          ? 
_diffrn_standards_interval_count  ? 
_diffrn_standards_interval_time   ? 
_diffrn_standards_decay_%         ? 
_diffrn_reflns_number             12375 
_diffrn_reflns_av_R_equivalents   0.0163 
_diffrn_reflns_av_sigmaI/netI     0.0150 
_diffrn_reflns_limit_h_min        -10 
_diffrn_reflns_limit_h_max        10 
_diffrn_reflns_limit_k_min        -13 
_diffrn_reflns_limit_k_max        14 
_diffrn_reflns_limit_l_min        0 
_diffrn_reflns_limit_l_max        16 
_diffrn_reflns_theta_min          3.43 
_diffrn_reflns_theta_max          66.95 
_reflns_number_total              4881 
_reflns_number_gt                 4593 
_reflns_threshold_expression      >2sigma(I) 
 
_computing_data_collection        'APEX2 v2.0-2 (Bruker, 2005)' 
_computing_cell_refinement        'SAINT v7.23A (Bruker, 2005)' 
_computing_data_reduction         'SADABS-2004/1 (Bruker, 2005)' 
_computing_structure_solution     'XS/SHELXTL v6.12 (Bruker, 2001)' 
_computing_structure_refinement   'SHELXL-97 v.97-2 (Sheldrick, 1993-1997)' 
_computing_molecular_graphics     'XP v5.1 (Bruker, 1998)' 
_computing_publication_material   'XCIF v6.12 (Bruker, 2001)' 
 
_refine_special_details 
; 
 Refinement of F^2^ against ALL reflections.  The weighted R-factor wR and 
 goodness of fit S are based on F^2^, conventional R-factors R are based 
 on F, with F set to zero for negative F^2^. The threshold expression of 
 F^2^ > 2sigma(F^2^) is used only for calculating R-factors(gt) etc. and is 
 not relevant to the choice of reflections for refinement.  R-factors based 
 on F^2^ are statistically about twice as large as those based on F, and R- 
 factors based on ALL data will be even larger. 
; 
 
_refine_ls_structure_factor_coef  Fsqd  
_refine_ls_matrix_type            full 
_refine_ls_weighting_scheme       calc  
_refine_ls_weighting_details 
 'calc w=1/[\s^2^(Fo^2^)+(0.0373P)^2^+0.5792P] where P=(Fo^2^+2Fc^2^)/3' 
_atom_sites_solution_primary      direct 
_atom_sites_solution_secondary    difmap 
_atom_sites_solution_hydrogens    difmap 
_refine_ls_hydrogen_treatment     refall
_refine_ls_extinction_method      SHELXL 
_refine_ls_extinction_coef        0.00228(19) 
_refine_ls_extinction_expression 
 'Fc^*^=kFc[1+0.001xFc^2^\l^3^/sin(2\q)]^-1/4^' 
_refine_ls_number_reflns          4881 
_refine_ls_number_parameters      536 
_refine_ls_number_restraints      0 
_refine_ls_R_factor_all           0.0321 
_refine_ls_R_factor_gt            0.0302 
_refine_ls_wR_factor_ref          0.0765 
_refine_ls_wR_factor_gt           0.0751 
_refine_ls_goodness_of_fit_ref    1.031 
_refine_ls_restrained_S_all       1.031 
_refine_ls_shift/su_max           0.001 
_refine_ls_shift/su_mean          0.000 
 
loop_ 
 _atom_site_label 
 _atom_site_type_symbol 
 _atom_site_fract_x 
 _atom_site_fract_y 
 _atom_site_fract_z 
 _atom_site_U_iso_or_equiv 
 _atom_site_adp_type 
 _atom_site_occupancy 
 _atom_site_symmetry_multiplicity 
 _atom_site_calc_flag 
 _atom_site_refinement_flags 
 _atom_site_disorder_assembly 
 _atom_site_disorder_group 
N1 N 0.26275(11) 0.77853(8) 0.12150(8) 0.0194(2) Uani 1 1 d . . . 
N2 N 0.23298(12) 0.84094(10) 0.02079(8) 0.0308(3) Uani 1 1 d . . . 
N3 N 0.46733(10) 0.84015(8) 0.18407(7) 0.0186(2) Uani 1 1 d . . . 
N4 N 0.57780(11) 0.81860(9) 0.25239(8) 0.0229(2) Uani 1 1 d . . . 
N5 N 0.42728(10) 0.64306(8) 0.24072(7) 0.0189(2) Uani 1 1 d . . . 
N6 N 0.35504(12) 0.63644(9) 0.33099(8) 0.0255(2) Uani 1 1 d . . . 
N7 N 0.74581(13) 0.64554(10) -0.17174(9) 0.0260(3) Uani 1 1 d . . . 
C1 C 0.14280(14) 0.76808(12) 0.18116(11) 0.0279(3) Uani 1 1 d . . . 
C2 C 0.03105(15) 0.82247(13) 0.11763(11) 0.0323(3) Uani 1 1 d . . . 
C3 C 0.09236(14) 0.86628(12) 0.01975(11) 0.0278(3) Uani 1 1 d . . . 
C4 C 0.44244(14) 0.95343(11) 0.13358(10) 0.0217(3) Uani 1 1 d . . . 
C5 C 0.53632(14) 1.00880(11) 0.17272(10) 0.0250(3) Uani 1 1 d . . . 
C6 C 0.61771(14) 0.92187(11) 0.24573(10) 0.0248(3) Uani 1 1 d . . . 
C7 C 0.51073(13) 0.54539(10) 0.24834(10) 0.0198(3) Uani 1 1 d . . . 
C8 C 0.48862(14) 0.47198(11) 0.34531(10) 0.0232(3) Uani 1 1 d . . . 
C9 C 0.39149(14) 0.53236(11) 0.39303(10) 0.0239(3) Uani 1 1 d . . . 
C10 C 0.41525(12) 0.74701(10) 0.15198(9) 0.0184(3) Uani 1 1 d . . . 
C11 C 0.50193(12) 0.72821(10) 0.06171(9) 0.0178(2) Uani 1 1 d . . . 
C12 C 0.44749(13) 0.66345(11) 0.00553(9) 0.0215(3) Uani 1 1 d . . . 
C13 C 0.52576(14) 0.63973(11) -0.07328(10) 0.0224(3) Uani 1 1 d . . . 
C14 C 0.66350(13) 0.67712(10) -0.09793(9) 0.0202(3) Uani 1 1 d . . . 
C15 C 0.71792(13) 0.74212(10) -0.04156(9) 0.0200(3) Uani 1 1 d . . . 
C16 C 0.63762(13) 0.76753(10) 0.03687(9) 0.0187(3) Uani 1 1 d . . . 
H7NA H 0.6999(19) 0.6160(15) -0.2151(13) 0.040(4) Uiso 1 1 d . . . 
H7NB H 0.8195(19) 0.6887(14) -0.2011(13) 0.038(4) Uiso 1 1 d . . . 
H1 H 0.1490(17) 0.7267(13) 0.2532(13) 0.035(4) Uiso 1 1 d . . . 
H2 H -0.065(2) 0.8296(15) 0.1364(13) 0.045(5) Uiso 1 1 d . . . 
H3 H 0.0467(17) 0.9103(13) -0.0452(13) 0.033(4) Uiso 1 1 d . . . 
H4 H 0.3707(16) 0.9799(12) 0.0813(11) 0.024(4) Uiso 1 1 d . . . 
H5 H 0.5484(16) 1.0874(13) 0.1532(11) 0.028(4) Uiso 1 1 d . . . 
H6 H 0.6955(16) 0.9289(13) 0.2889(12) 0.029(4) Uiso 1 1 d . . . 
H7 H 0.5691(15) 0.5379(11) 0.1935(11) 0.018(3) Uiso 1 1 d . . . 
H8 H 0.5318(16) 0.3963(13) 0.3746(11) 0.029(4) Uiso 1 1 d . . . 
H9 H 0.3506(16) 0.5089(12) 0.4620(12) 0.028(4) Uiso 1 1 d . . . 
H12 H 0.3521(17) 0.6345(12) 0.0235(11) 0.027(4) Uiso 1 1 d . . . 
H13 H 0.4859(16) 0.5960(13) -0.1118(11) 0.027(4) Uiso 1 1 d . . . 
H15 H 0.8134(16) 0.7690(12) -0.0568(10) 0.022(3) Uiso 1 1 d . . . 
H16 H 0.6780(14) 0.8114(11) 0.0747(10) 0.019(3) Uiso 1 1 d . . . 
N1A N 0.73869(10) 0.21598(8) 0.38182(8) 0.0180(2) Uani 1 1 d . . . 
N2A N 0.64249(11) 0.20893(9) 0.31030(8) 0.0222(2) Uani 1 1 d . . . 
N3A N 0.95213(10) 0.14213(8) 0.32306(7) 0.0175(2) Uani 1 1 d . . . 
N4A N 1.06840(11) 0.15078(9) 0.25939(8) 0.0223(2) Uani 1 1 d . . . 
N5A N 0.88147(10) 0.33779(8) 0.24927(7) 0.0178(2) Uani 1 1 d . . . 
N6A N 0.91230(11) 0.44398(8) 0.24839(8) 0.0203(2) Uani 1 1 d . . . 
N7A N 1.20024(13) 0.37613(10) 0.63985(9) 0.0260(3) Uani 1 1 d . . . 
C1A C 0.68997(13) 0.17047(10) 0.48091(10) 0.0210(3) Uani 1 1 d . . . 
C2A C 0.55584(14) 0.13643(11) 0.47340(11) 0.0243(3) Uani 1 1 d . . . 
C3A C 0.53171(14) 0.16219(11) 0.36666(11) 0.0247(3) Uani 1 1 d . . . 
C4A C 0.92077(13) 0.03238(10) 0.36724(10) 0.0201(3) Uani 1 1 d . . . 
C5A C 1.01790(14) -0.03339(11) 0.32970(10) 0.0234(3) Uani 1 1 d . . . 
C6A C 1.10670(14) 0.04391(11) 0.26329(10) 0.0233(3) Uani 1 1 d . . . 
C7A C 0.84803(13) 0.33588(11) 0.15261(9) 0.0222(3) Uani 1 1 d . . . 
C8A C 0.85790(13) 0.44350(11) 0.08669(10) 0.0220(3) Uani 1 1 d . . . 
C9A C 0.89763(14) 0.50658(11) 0.14954(10) 0.0228(3) Uani 1 1 d . . . 
C10A C 0.88604(12) 0.24350(10) 0.34678(9) 0.0173(2) Uani 1 1 d . . . 
C11A C 0.96844(12) 0.27174(10) 0.42964(9) 0.0166(2) Uani 1 1 d . . . 
C12A C 0.90263(13) 0.34250(10) 0.48252(9) 0.0171(2) Uani 1 1 d . . . 
C13A C 0.97710(13) 0.37378(10) 0.55456(9) 0.0177(2) Uani 1 1 d . . . 
C14A C 1.12332(13) 0.33873(10) 0.57407(9) 0.0185(3) Uani 1 1 d . . . 
C15A C 1.18895(13) 0.26821(10) 0.52043(9) 0.0197(3) Uani 1 1 d . . . 
C16A C 1.11264(13) 0.23501(10) 0.44991(9) 0.0183(3) Uani 1 1 d . . . 
H7NC H 1.2804(19) 0.3365(14) 0.6672(12) 0.033(4) Uiso 1 1 d . . . 
H7ND H 1.1559(17) 0.4229(14) 0.6690(12) 0.031(4) Uiso 1 1 d . . . 
H1A H 0.7457(16) 0.1673(12) 0.5390(12) 0.025(4) Uiso 1 1 d . . . 
H2A H 0.4923(16) 0.1027(13) 0.5306(12) 0.029(4) Uiso 1 1 d . . . 
H3A H 0.4483(17) 0.1499(12) 0.3327(11) 0.029(4) Uiso 1 1 d . . . 
H4A H 0.8444(15) 0.0144(12) 0.4135(11) 0.021(3) Uiso 1 1 d . . . 
H5A H 1.0211(17) -0.1131(14) 0.3459(12) 0.034(4) Uiso 1 1 d . . . 
H6A H 1.1888(16) 0.0278(12) 0.2233(11) 0.027(4) Uiso 1 1 d . . . 
H7A H 0.8241(16) 0.2685(13) 0.1410(11) 0.028(4) Uiso 1 1 d . . . 
H8A H 0.8428(15) 0.4706(12) 0.0128(12) 0.026(4) Uiso 1 1 d . . . 
H9A H 0.9165(16) 0.5867(14) 0.1287(12) 0.031(4) Uiso 1 1 d . . . 
H12A H 0.8037(15) 0.3703(11) 0.4685(10) 0.016(3) Uiso 1 1 d . . . 
H13A H 0.9287(14) 0.4236(12) 0.5902(10) 0.019(3) Uiso 1 1 d . . . 
H15A H 1.2885(17) 0.2445(12) 0.5320(11) 0.026(4) Uiso 1 1 d . . . 
H16A H 1.1628(14) 0.1872(11) 0.4123(10) 0.019(3) Uiso 1 1 d . . . 
 
loop_ 
 _atom_site_aniso_label 
 _atom_site_aniso_U_11 
 _atom_site_aniso_U_22 
 _atom_site_aniso_U_33 
 _atom_site_aniso_U_23 
 _atom_site_aniso_U_13 
 _atom_site_aniso_U_12 
N1 0.0190(5) 0.0203(5) 0.0183(5) -0.0056(4) -0.0022(4) 0.0013(4) 
N2 0.0262(6) 0.0390(7) 0.0211(6) -0.0020(5) -0.0051(5) 0.0054(5) 
N3 0.0195(5) 0.0203(5) 0.0162(5) -0.0065(4) -0.0024(4) 0.0022(4) 
N4 0.0237(5) 0.0253(6) 0.0200(5) -0.0078(5) -0.0061(4) 0.0016(4) 
N5 0.0192(5) 0.0196(5) 0.0167(5) -0.0043(4) 0.0009(4) 0.0007(4) 
N6 0.0259(6) 0.0282(6) 0.0187(5) -0.0037(5) 0.0039(4) 0.0042(4) 
N7 0.0266(6) 0.0304(6) 0.0240(6) -0.0123(5) 0.0057(5) -0.0052(5) 
C1 0.0212(7) 0.0347(8) 0.0246(7) -0.0054(6) 0.0016(5) -0.0006(5) 
C2 0.0177(7) 0.0427(8) 0.0361(8) -0.0123(7) -0.0018(6) 0.0016(6) 
C3 0.0254(7) 0.0292(7) 0.0288(7) -0.0100(6) -0.0100(6) 0.0062(5) 
C4 0.0248(6) 0.0200(6) 0.0187(6) -0.0050(5) -0.0010(5) 0.0042(5) 
C5 0.0333(7) 0.0198(7) 0.0228(6) -0.0080(6) 0.0017(5) -0.0018(5) 
C6 0.0273(7) 0.0260(7) 0.0237(6) -0.0108(6) -0.0030(5) -0.0031(5) 
C7 0.0188(6) 0.0208(6) 0.0219(6) -0.0098(5) -0.0019(5) 0.0005(5) 
C8 0.0243(6) 0.0187(6) 0.0246(6) -0.0042(5) -0.0043(5) 0.0003(5) 
C9 0.0232(6) 0.0261(7) 0.0182(6) -0.0014(5) 0.0003(5) 0.0002(5) 
C10 0.0183(6) 0.0186(6) 0.0179(6) -0.0056(5) -0.0018(5) 0.0007(4) 
C11 0.0184(6) 0.0182(6) 0.0153(6) -0.0037(5) -0.0020(5) 0.0019(4) 
C12 0.0194(6) 0.0250(6) 0.0204(6) -0.0068(5) -0.0002(5) -0.0040(5) 
C13 0.0253(7) 0.0232(6) 0.0200(6) -0.0081(5) -0.0016(5) -0.0038(5) 
C14 0.0242(6) 0.0176(6) 0.0161(6) -0.0019(5) -0.0008(5) 0.0020(5) 
C15 0.0172(6) 0.0204(6) 0.0200(6) -0.0029(5) 0.0007(5) -0.0019(5) 
C16 0.0214(6) 0.0164(6) 0.0176(6) -0.0044(5) -0.0037(5) -0.0001(5) 
N1A 0.0177(5) 0.0181(5) 0.0184(5) -0.0060(4) -0.0004(4) -0.0017(4) 
N2A 0.0199(5) 0.0246(5) 0.0241(5) -0.0105(5) -0.0027(4) -0.0014(4) 
N3A 0.0191(5) 0.0177(5) 0.0162(5) -0.0059(4) 0.0018(4) -0.0016(4) 
N4A 0.0234(5) 0.0234(5) 0.0211(5) -0.0088(5) 0.0058(4) -0.0025(4) 
N5A 0.0205(5) 0.0162(5) 0.0161(5) -0.0040(4) 0.0000(4) -0.0024(4) 
N6A 0.0243(5) 0.0152(5) 0.0210(5) -0.0051(4) 0.0011(4) -0.0018(4) 
N7A 0.0266(6) 0.0248(6) 0.0301(6) -0.0146(5) -0.0106(5) 0.0063(5) 
C1A 0.0240(6) 0.0187(6) 0.0191(6) -0.0042(5) 0.0020(5) -0.0019(5) 
C2A 0.0224(7) 0.0205(6) 0.0300(7) -0.0081(6) 0.0067(5) -0.0035(5) 
C3A 0.0183(6) 0.0251(7) 0.0338(7) -0.0132(6) -0.0004(5) -0.0032(5) 
C4A 0.0219(6) 0.0176(6) 0.0195(6) -0.0035(5) -0.0004(5) -0.0026(5) 
C5A 0.0288(7) 0.0171(6) 0.0239(6) -0.0061(5) -0.0021(5) 0.0008(5) 
C6A 0.0249(7) 0.0237(7) 0.0223(6) -0.0099(5) 0.0010(5) 0.0028(5) 
C7A 0.0258(7) 0.0233(7) 0.0183(6) -0.0072(5) -0.0016(5) -0.0041(5) 
C8A 0.0219(6) 0.0256(7) 0.0160(6) -0.0029(5) -0.0012(5) -0.0009(5) 
C9A 0.0265(7) 0.0179(6) 0.0208(6) -0.0017(5) 0.0008(5) -0.0008(5) 
C10A 0.0186(6) 0.0157(6) 0.0168(6) -0.0043(5) 0.0019(5) -0.0007(4) 
C11A 0.0193(6) 0.0144(6) 0.0143(5) -0.0017(5) 0.0014(4) -0.0030(4) 
C12A 0.0170(6) 0.0149(6) 0.0173(6) -0.0022(5) 0.0013(4) -0.0008(4) 
C13A 0.0217(6) 0.0142(5) 0.0162(6) -0.0036(5) 0.0025(5) -0.0016(4) 
C14A 0.0227(6) 0.0146(6) 0.0163(6) -0.0016(5) -0.0014(5) -0.0025(5) 
C15A 0.0172(6) 0.0186(6) 0.0209(6) -0.0031(5) -0.0015(5) 0.0006(5) 
C16A 0.0207(6) 0.0156(6) 0.0171(6) -0.0036(5) 0.0025(5) 0.0000(5) 
 
_geom_special_details 
; 
 All esds (except the esd in the dihedral angle between two l.s. planes) 
 are estimated using the full covariance matrix.  The cell esds are taken 
 into account individually in the estimation of esds in distances, angles 
 and torsion angles; correlations between esds in cell parameters are only 
 used when they are defined by crystal symmetry.  An approximate (isotropic) 
 treatment of cell esds is used for estimating esds involving l.s. planes. 
; 
 
loop_ 
 _geom_bond_atom_site_label_1 
 _geom_bond_atom_site_label_2 
 _geom_bond_distance 
 _geom_bond_site_symmetry_2 
 _geom_bond_publ_flag 
N1 C1 1.3537(17) . ? 
N1 N2 1.3656(15) . ? 
N1 C10 1.4794(15) . ? 
N2 C3 1.3240(18) . ? 
N3 N4 1.3574(14) . ? 
N3 C4 1.3597(16) . ? 
N3 C10 1.4727(16) . ? 
N4 C6 1.3353(17) . ? 
N5 C7 1.3646(16) . ? 
N5 N6 1.3648(14) . ? 
N5 C10 1.4605(15) . ? 
N6 C9 1.3243(17) . ? 
N7 C14 1.3802(16) . ? 
N7 H7NA 0.914(18) . ? 
N7 H7NB 0.909(18) . ? 
C1 C2 1.362(2) . ? 
C1 H1 0.952(16) . ? 
C2 C3 1.393(2) . ? 
C2 H2 0.929(19) . ? 
C3 H3 0.968(16) . ? 
C4 C5 1.3649(19) . ? 
C4 H4 0.950(15) . ? 
C5 C6 1.4004(19) . ? 
C5 H5 0.941(15) . ? 
C6 H6 0.970(16) . ? 
C7 C8 1.3655(18) . ? 
C7 H7 0.934(14) . ? 
C8 C9 1.4031(19) . ? 
C8 H8 0.957(15) . ? 
C9 H9 0.966(15) . ? 
C10 C11 1.5185(16) . ? 
C11 C16 1.3860(17) . ? 
C11 C12 1.3957(17) . ? 
C12 C13 1.3733(18) . ? 
C12 H12 0.981(15) . ? 
C13 C14 1.3956(18) . ? 
C13 H13 0.961(15) . ? 
C14 C15 1.3998(18) . ? 
C15 C16 1.3873(17) . ? 
C15 H15 0.969(14) . ? 
C16 H16 0.957(14) . ? 
N1A N2A 1.3648(14) . ? 
N1A C1A 1.3650(16) . ? 
N1A C10A 1.4718(15) . ? 
N2A C3A 1.3267(17) . ? 
N3A C4A 1.3546(16) . ? 
N3A N4A 1.3581(14) . ? 
N3A C10A 1.4784(15) . ? 
N4A C6A 1.3299(17) . ? 
N5A C7A 1.3632(16) . ? 
N5A N6A 1.3647(14) . ? 
N5A C10A 1.4636(15) . ? 
N6A C9A 1.3262(16) . ? 
N7A C14A 1.3668(16) . ? 
N7A H7NC 0.884(17) . ? 
N7A H7ND 0.873(17) . ? 
C1A C2A 1.3661(18) . ? 
C1A H1A 0.944(15) . ? 
C2A C3A 1.4016(19) . ? 
C2A H2A 0.969(16) . ? 
C3A H3A 0.959(16) . ? 
C4A C5A 1.3664(18) . ? 
C4A H4A 0.930(15) . ? 
C5A C6A 1.3988(19) . ? 
C5A H5A 0.940(16) . ? 
C6A H6A 0.971(15) . ? 
C7A C8A 1.3613(18) . ? 
C7A H7A 0.940(16) . ? 
C8A C9A 1.3977(19) . ? 
C8A H8A 0.962(15) . ? 
C9A H9A 0.971(16) . ? 
C10A C11A 1.5192(16) . ? 
C11A C16A 1.3917(17) . ? 
C11A C12A 1.3962(17) . ? 
C12A C13A 1.3785(17) . ? 
C12A H12A 0.961(14) . ? 
C13A C14A 1.4046(17) . ? 
C13A H13A 0.976(14) . ? 
C14A C15A 1.4005(18) . ? 
C15A C16A 1.3844(17) . ? 
C15A H15A 0.954(15) . ? 
C16A H16A 0.981(14) . ? 
 
loop_ 
 _geom_angle_atom_site_label_1 
 _geom_angle_atom_site_label_2 
 _geom_angle_atom_site_label_3 
 _geom_angle 
 _geom_angle_site_symmetry_1 
 _geom_angle_site_symmetry_3 
 _geom_angle_publ_flag 
C1 N1 N2 111.37(10) . . ? 
C1 N1 C10 129.88(10) . . ? 
N2 N1 C10 118.17(10) . . ? 
C3 N2 N1 104.39(11) . . ? 
N4 N3 C4 111.99(10) . . ? 
N4 N3 C10 119.96(9) . . ? 
C4 N3 C10 125.89(10) . . ? 
C6 N4 N3 103.96(10) . . ? 
C7 N5 N6 111.59(10) . . ? 
C7 N5 C10 127.35(10) . . ? 
N6 N5 C10 121.01(9) . . ? 
C9 N6 N5 104.45(10) . . ? 
C14 N7 H7NA 117.4(11) . . ? 
C14 N7 H7NB 117.7(10) . . ? 
H7NA N7 H7NB 115.0(15) . . ? 
N1 C1 C2 107.10(12) . . ? 
N1 C1 H1 119.8(10) . . ? 
C2 C1 H1 133.1(10) . . ? 
C1 C2 C3 105.15(12) . . ? 
C1 C2 H2 127.0(11) . . ? 
C3 C2 H2 127.8(11) . . ? 
N2 C3 C2 111.96(12) . . ? 
N2 C3 H3 118.8(9) . . ? 
C2 C3 H3 129.2(9) . . ? 
N3 C4 C5 107.13(11) . . ? 
N3 C4 H4 120.6(9) . . ? 
C5 C4 H4 132.3(9) . . ? 
C4 C5 C6 104.68(11) . . ? 
C4 C5 H5 128.4(9) . . ? 
C6 C5 H5 126.8(9) . . ? 
N4 C6 C5 112.19(11) . . ? 
N4 C6 H6 119.6(9) . . ? 
C5 C6 H6 128.2(9) . . ? 
N5 C7 C8 106.79(11) . . ? 
N5 C7 H7 121.7(8) . . ? 
C8 C7 H7 131.5(8) . . ? 
C7 C8 C9 105.09(11) . . ? 
C7 C8 H8 127.2(9) . . ? 
C9 C8 H8 127.7(9) . . ? 
N6 C9 C8 112.04(11) . . ? 
N6 C9 H9 118.4(9) . . ? 
C8 C9 H9 129.6(9) . . ? 
N5 C10 N3 108.16(9) . . ? 
N5 C10 N1 110.23(9) . . ? 
N3 C10 N1 107.30(9) . . ? 
N5 C10 C11 109.40(9) . . ? 
N3 C10 C11 111.72(9) . . ? 
N1 C10 C11 110.00(9) . . ? 
C16 C11 C12 118.57(11) . . ? 
C16 C11 C10 122.15(11) . . ? 
C12 C11 C10 119.17(10) . . ? 
C13 C12 C11 120.94(11) . . ? 
C13 C12 H12 120.2(8) . . ? 
C11 C12 H12 118.8(8) . . ? 
C12 C13 C14 121.08(12) . . ? 
C12 C13 H13 119.8(9) . . ? 
C14 C13 H13 119.1(9) . . ? 
N7 C14 C13 120.71(12) . . ? 
N7 C14 C15 121.31(11) . . ? 
C13 C14 C15 117.89(11) . . ? 
C16 C15 C14 120.87(11) . . ? 
C16 C15 H15 119.5(8) . . ? 
C14 C15 H15 119.7(8) . . ? 
C11 C16 C15 120.62(11) . . ? 
C11 C16 H16 120.3(8) . . ? 
C15 C16 H16 119.1(8) . . ? 
N2A N1A C1A 111.74(10) . . ? 
N2A N1A C10A 118.14(9) . . ? 
C1A N1A C10A 128.33(10) . . ? 
C3A N2A N1A 104.24(10) . . ? 
C4A N3A N4A 111.83(10) . . ? 
C4A N3A C10A 127.26(10) . . ? 
N4A N3A C10A 120.48(9) . . ? 
C6A N4A N3A 104.30(10) . . ? 
C7A N5A N6A 111.69(10) . . ? 
C7A N5A C10A 128.17(10) . . ? 
N6A N5A C10A 120.13(9) . . ? 
C9A N6A N5A 103.90(10) . . ? 
C14A N7A H7NC 118.7(10) . . ? 
C14A N7A H7ND 118.0(10) . . ? 
H7NC N7A H7ND 120.2(14) . . ? 
N1A C1A C2A 106.71(11) . . ? 
N1A C1A H1A 121.7(9) . . ? 
C2A C1A H1A 131.6(9) . . ? 
C1A C2A C3A 105.11(11) . . ? 
C1A C2A H2A 126.4(9) . . ? 
C3A C2A H2A 128.5(9) . . ? 
N2A C3A C2A 112.15(11) . . ? 
N2A C3A H3A 119.6(9) . . ? 
C2A C3A H3A 128.2(9) . . ? 
N3A C4A C5A 107.09(11) . . ? 
N3A C4A H4A 120.6(9) . . ? 
C5A C4A H4A 132.3(9) . . ? 
C4A C5A C6A 104.79(11) . . ? 
C4A C5A H5A 126.0(10) . . ? 
C6A C5A H5A 129.2(10) . . ? 
N4A C6A C5A 111.96(11) . . ? 
N4A C6A H6A 119.9(9) . . ? 
C5A C6A H6A 128.2(9) . . ? 
C8A C7A N5A 106.99(11) . . ? 
C8A C7A H7A 131.6(9) . . ? 
N5A C7A H7A 121.4(9) . . ? 
C7A C8A C9A 104.88(11) . . ? 
C7A C8A H8A 128.0(9) . . ? 
C9A C8A H8A 127.1(9) . . ? 
N6A C9A C8A 112.54(11) . . ? 
N6A C9A H9A 119.5(9) . . ? 
C8A C9A H9A 128.0(9) . . ? 
N5A C10A N1A 109.77(9) . . ? 
N5A C10A N3A 106.84(9) . . ? 
N1A C10A N3A 105.70(9) . . ? 
N5A C10A C11A 111.17(9) . . ? 
N1A C10A C11A 110.84(9) . . ? 
N3A C10A C11A 112.29(9) . . ? 
C16A C11A C12A 118.31(11) . . ? 
C16A C11A C10A 121.53(10) . . ? 
C12A C11A C10A 120.02(10) . . ? 
C13A C12A C11A 121.18(11) . . ? 
C13A C12A H12A 119.2(8) . . ? 
C11A C12A H12A 119.7(8) . . ? 
C12A C13A C14A 120.81(11) . . ? 
C12A C13A H13A 119.5(8) . . ? 
C14A C13A H13A 119.6(8) . . ? 
N7A C14A C15A 121.19(11) . . ? 
N7A C14A C13A 121.04(11) . . ? 
C15A C14A C13A 117.72(11) . . ? 
C16A C15A C14A 121.14(11) . . ? 
C16A C15A H15A 120.0(9) . . ? 
C14A C15A H15A 118.8(9) . . ? 
C15A C16A C11A 120.80(11) . . ? 
C15A C16A H16A 118.9(8) . . ? 
C11A C16A H16A 120.2(8) . . ? 
 
loop_ 
 _geom_torsion_atom_site_label_1 
 _geom_torsion_atom_site_label_2 
 _geom_torsion_atom_site_label_3 
 _geom_torsion_atom_site_label_4 
 _geom_torsion 
 _geom_torsion_site_symmetry_1 
 _geom_torsion_site_symmetry_2 
 _geom_torsion_site_symmetry_3 
 _geom_torsion_site_symmetry_4 
 _geom_torsion_publ_flag 
C1 N1 N2 C3 -1.25(15) . . . . ? 
C10 N1 N2 C3 -173.35(11) . . . . ? 
C4 N3 N4 C6 2.11(13) . . . . ? 
C10 N3 N4 C6 166.38(10) . . . . ? 
C7 N5 N6 C9 -1.91(14) . . . . ? 
C10 N5 N6 C9 -179.57(11) . . . . ? 
N2 N1 C1 C2 1.52(16) . . . . ? 
C10 N1 C1 C2 172.43(12) . . . . ? 
N1 C1 C2 C3 -1.12(16) . . . . ? 
N1 N2 C3 C2 0.51(16) . . . . ? 
C1 C2 C3 N2 0.38(17) . . . . ? 
N4 N3 C4 C5 -2.25(14) . . . . ? 
C10 N3 C4 C5 -165.39(11) . . . . ? 
N3 C4 C5 C6 1.37(14) . . . . ? 
N3 N4 C6 C5 -1.20(14) . . . . ? 
C4 C5 C6 N4 -0.10(15) . . . . ? 
N6 N5 C7 C8 1.86(14) . . . . ? 
C10 N5 C7 C8 179.34(11) . . . . ? 
N5 C7 C8 C9 -1.00(13) . . . . ? 
N5 N6 C9 C8 1.24(14) . . . . ? 
C7 C8 C9 N6 -0.16(15) . . . . ? 
C7 N5 C10 N3 -116.96(12) . . . . ? 
N6 N5 C10 N3 60.31(13) . . . . ? 
C7 N5 C10 N1 126.02(12) . . . . ? 
N6 N5 C10 N1 -56.72(14) . . . . ? 
C7 N5 C10 C11 4.94(16) . . . . ? 
N6 N5 C10 C11 -177.79(10) . . . . ? 
N4 N3 C10 N5 34.88(13) . . . . ? 
C4 N3 C10 N5 -163.20(11) . . . . ? 
N4 N3 C10 N1 153.78(10) . . . . ? 
C4 N3 C10 N1 -44.30(15) . . . . ? 
N4 N3 C10 C11 -85.58(12) . . . . ? 
C4 N3 C10 C11 76.34(14) . . . . ? 
C1 N1 C10 N5 35.78(17) . . . . ? 
N2 N1 C10 N5 -153.83(10) . . . . ? 
C1 N1 C10 N3 -81.78(15) . . . . ? 
N2 N1 C10 N3 88.62(12) . . . . ? 
C1 N1 C10 C11 156.50(13) . . . . ? 
N2 N1 C10 C11 -33.11(14) . . . . ? 
N5 C10 C11 C16 -100.55(13) . . . . ? 
N3 C10 C11 C16 19.18(15) . . . . ? 
N1 C10 C11 C16 138.23(11) . . . . ? 
N5 C10 C11 C12 75.51(13) . . . . ? 
N3 C10 C11 C12 -164.75(10) . . . . ? 
N1 C10 C11 C12 -45.70(14) . . . . ? 
C16 C11 C12 C13 -0.52(18) . . . . ? 
C10 C11 C12 C13 -176.73(11) . . . . ? 
C11 C12 C13 C14 1.64(19) . . . . ? 
C12 C13 C14 N7 174.95(12) . . . . ? 
C12 C13 C14 C15 -1.62(18) . . . . ? 
N7 C14 C15 C16 -176.01(11) . . . . ? 
C13 C14 C15 C16 0.54(17) . . . . ? 
C12 C11 C16 C15 -0.56(17) . . . . ? 
C10 C11 C16 C15 175.53(11) . . . . ? 
C14 C15 C16 C11 0.54(18) . . . . ? 
C1A N1A N2A C3A 2.18(13) . . . . ? 
C10A N1A N2A C3A 168.19(10) . . . . ? 
C4A N3A N4A C6A 1.30(13) . . . . ? 
C10A N3A N4A C6A 174.34(10) . . . . ? 
C7A N5A N6A C9A -0.24(13) . . . . ? 
C10A N5A N6A C9A -179.86(10) . . . . ? 
N2A N1A C1A C2A -2.14(14) . . . . ? 
C10A N1A C1A C2A -166.38(11) . . . . ? 
N1A C1A C2A C3A 1.17(14) . . . . ? 
N1A N2A C3A C2A -1.40(14) . . . . ? 
C1A C2A C3A N2A 0.16(15) . . . . ? 
N4A N3A C4A C5A -1.28(14) . . . . ? 
C10A N3A C4A C5A -173.74(11) . . . . ? 
N3A C4A C5A C6A 0.69(14) . . . . ? 
N3A N4A C6A C5A -0.84(14) . . . . ? 
C4A C5A C6A N4A 0.10(15) . . . . ? 
N6A N5A C7A C8A 0.29(14) . . . . ? 
C10A N5A C7A C8A 179.87(11) . . . . ? 
N5A C7A C8A C9A -0.21(14) . . . . ? 
N5A N6A C9A C8A 0.10(14) . . . . ? 
C7A C8A C9A N6A 0.07(15) . . . . ? 
C7A N5A C10A N1A -73.47(14) . . . . ? 
N6A N5A C10A N1A 106.08(11) . . . . ? 
C7A N5A C10A N3A 40.69(15) . . . . ? 
N6A N5A C10A N3A -139.76(10) . . . . ? 
C7A N5A C10A C11A 163.52(11) . . . . ? 
N6A N5A C10A C11A -16.92(14) . . . . ? 
N2A N1A C10A N5A 45.11(13) . . . . ? 
C1A N1A C10A N5A -151.52(11) . . . . ? 
N2A N1A C10A N3A -69.78(12) . . . . ? 
C1A N1A C10A N3A 93.59(13) . . . . ? 
N2A N1A C10A C11A 168.31(10) . . . . ? 
C1A N1A C10A C11A -28.32(16) . . . . ? 
C4A N3A C10A N5A -145.87(11) . . . . ? 
N4A N3A C10A N5A 42.26(13) . . . . ? 
C4A N3A C10A N1A -28.98(15) . . . . ? 
N4A N3A C10A N1A 159.15(10) . . . . ? 
C4A N3A C10A C11A 91.99(14) . . . . ? 
N4A N3A C10A C11A -79.87(12) . . . . ? 
N5A C10A C11A C16A -97.18(12) . . . . ? 
N1A C10A C11A C16A 140.43(11) . . . . ? 
N3A C10A C11A C16A 22.45(15) . . . . ? 
N5A C10A C11A C12A 78.37(13) . . . . ? 
N1A C10A C11A C12A -44.02(14) . . . . ? 
N3A C10A C11A C12A -161.99(10) . . . . ? 
C16A C11A C12A C13A -1.23(17) . . . . ? 
C10A C11A C12A C13A -176.92(10) . . . . ? 
C11A C12A C13A C14A 2.40(17) . . . . ? 
C12A C13A C14A N7A 175.28(11) . . . . ? 
C12A C13A C14A C15A -2.03(17) . . . . ? 
N7A C14A C15A C16A -176.74(11) . . . . ? 
C13A C14A C15A C16A 0.56(17) . . . . ? 
C14A C15A C16A C11A 0.56(18) . . . . ? 
C12A C11A C16A C15A -0.25(17) . . . . ? 
C10A C11A C16A C15A 175.38(11) . . . . ? 
 
_diffrn_measured_fraction_theta_max    0.924 
_diffrn_reflns_theta_full              66.95 
_diffrn_measured_fraction_theta_full   0.924 
_refine_diff_density_max    0.220 
_refine_diff_density_min   -0.198 
_refine_diff_density_rms    0.032 

#===END
 
data_oAnTpm 
 
_audit_creation_method            SHELXL-97 
_chemical_name_systematic 
; 
 ? 
; 
_chemical_name_common             ? 
_chemical_melting_point           ? 
_chemical_formula_moiety          ? 
_chemical_formula_sum 
 'C16 H15 N7' 
_chemical_formula_weight          305.35 
 
loop_ 
 _atom_type_symbol 
 _atom_type_description 
 _atom_type_scat_dispersion_real 
 _atom_type_scat_dispersion_imag 
 _atom_type_scat_source 
 'C'  'C'   0.0181   0.0091 
 'International Tables Vol C Tables 4.2.6.8 and 6.1.1.4' 
 'H'  'H'   0.0000   0.0000 
 'International Tables Vol C Tables 4.2.6.8 and 6.1.1.4' 
 'N'  'N'   0.0311   0.0180 
 'International Tables Vol C Tables 4.2.6.8 and 6.1.1.4' 
 
_symmetry_cell_setting            monoclinic 
_symmetry_space_group_name_H-M    'P 21/n'
 
loop_ 
 _symmetry_equiv_pos_as_xyz 
 'x, y, z' 
 '-x+1/2, y+1/2, -z+1/2' 
 '-x, -y, -z' 
 'x-1/2, -y-1/2, z-1/2' 
 
_cell_length_a                    8.43810(10) 
_cell_length_b                    11.67360(10) 
_cell_length_c                    15.5291(2) 
_cell_angle_alpha                 90.00 
_cell_angle_beta                  102.6550(10) 
_cell_angle_gamma                 90.00 
_cell_volume                      1492.50(3) 
_cell_formula_units_Z             4 
_cell_measurement_temperature     100(2) 
_cell_measurement_reflns_used     9934 
_cell_measurement_theta_min       3
_cell_measurement_theta_max       67 
 
_exptl_crystal_description        'block' 
_exptl_crystal_colour             'colorless'
_exptl_crystal_size_max           0.45 
_exptl_crystal_size_mid           0.44 
_exptl_crystal_size_min           0.35 
_exptl_crystal_density_meas       ? 
_exptl_crystal_density_diffrn     1.359 
_exptl_crystal_density_method     'not measured' 
_exptl_crystal_F_000              640 
_exptl_absorpt_coefficient_mu     0.713 
_exptl_absorpt_correction_type    multi-scan 
_exptl_absorpt_correction_T_min   0.7398 
_exptl_absorpt_correction_T_max   0.7885 
_exptl_absorpt_process_details    ? 
 
_exptl_special_details 
; 
 ? 
; 
 
_diffrn_ambient_temperature       100(2) 
_diffrn_radiation_wavelength      1.54178 
_diffrn_radiation_type            CuK\a 
_diffrn_radiation_source          'fine-focus sealed tube' 
_diffrn_radiation_monochromator   graphite 
_diffrn_measurement_device_type   'Bruker APEX2 CCD detector' 
_diffrn_measurement_method        '\w scans' 
_diffrn_detector_area_resol_mean  ? 
_diffrn_standards_number          ? 
_diffrn_standards_interval_count  ? 
_diffrn_standards_interval_time   ? 
_diffrn_standards_decay_%         ? 
_diffrn_reflns_number             12244 
_diffrn_reflns_av_R_equivalents   0.0170 
_diffrn_reflns_av_sigmaI/netI     0.0099 
_diffrn_reflns_limit_h_min        -10 
_diffrn_reflns_limit_h_max        9 
_diffrn_reflns_limit_k_min        0 
_diffrn_reflns_limit_k_max        13 
_diffrn_reflns_limit_l_min        0 
_diffrn_reflns_limit_l_max        18 
_diffrn_reflns_theta_min          4.78 
_diffrn_reflns_theta_max          67.11 
_reflns_number_total              2578 
_reflns_number_gt                 2551 
_reflns_threshold_expression      >2sigma(I) 
 
_computing_data_collection        'APEX2 v2.0-2 (Bruker, 2005)' 
_computing_cell_refinement        'SAINT v7.23A (Bruker, 2005)' 
_computing_data_reduction         'SADABS-2004/1 (Bruker, 2005)' 
_computing_structure_solution     'XS/SHELXTL v6.12 (Bruker, 2001)' 
_computing_structure_refinement   'SHELXL-97 v.97-2 (Sheldrick, 1993-1997)' 
_computing_molecular_graphics     'XP v5.1 (Bruker, 1998)' 
_computing_publication_material   'XCIF v6.12 (Bruker, 2001)' 
 
_refine_special_details 
; 
 Refinement of F^2^ against ALL reflections.  The weighted R-factor wR and 
 goodness of fit S are based on F^2^, conventional R-factors R are based 
 on F, with F set to zero for negative F^2^. The threshold expression of 
 F^2^ > 2sigma(F^2^) is used only for calculating R-factors(gt) etc. and is 
 not relevant to the choice of reflections for refinement.  R-factors based 
 on F^2^ are statistically about twice as large as those based on F, and R- 
 factors based on ALL data will be even larger. 
; 
 
_refine_ls_structure_factor_coef  Fsqd  
_refine_ls_matrix_type            full 
_refine_ls_weighting_scheme       calc  
_refine_ls_weighting_details 
 'calc w=1/[\s^2^(Fo^2^)+(0.0388P)^2^+0.6235P] where P=(Fo^2^+2Fc^2^)/3' 
_atom_sites_solution_primary      direct 
_atom_sites_solution_secondary    difmap 
_atom_sites_solution_hydrogens    difmap
_refine_ls_hydrogen_treatment     refall
_refine_ls_extinction_method      SHELXL 
_refine_ls_extinction_coef        0.0047(3) 
_refine_ls_extinction_expression 
 'Fc^*^=kFc[1+0.001xFc^2^\l^3^/sin(2\q)]^-1/4^' 
_refine_ls_number_reflns          2578 
_refine_ls_number_parameters      269 
_refine_ls_number_restraints      0 
_refine_ls_R_factor_all           0.0301 
_refine_ls_R_factor_gt            0.0299 
_refine_ls_wR_factor_ref          0.0766 
_refine_ls_wR_factor_gt           0.0764 
_refine_ls_goodness_of_fit_ref    1.018 
_refine_ls_restrained_S_all       1.018 
_refine_ls_shift/su_max           0.001 
_refine_ls_shift/su_mean          0.000 
 
loop_ 
 _atom_site_label 
 _atom_site_type_symbol 
 _atom_site_fract_x 
 _atom_site_fract_y 
 _atom_site_fract_z 
 _atom_site_U_iso_or_equiv 
 _atom_site_adp_type 
 _atom_site_occupancy 
 _atom_site_symmetry_multiplicity 
 _atom_site_calc_flag 
 _atom_site_refinement_flags 
 _atom_site_disorder_assembly 
 _atom_site_disorder_group 
N1 N 0.16174(11) 0.10861(8) 0.83821(6) 0.0183(2) Uani 1 1 d . . . 
N2 N 0.00123(11) 0.08426(9) 0.81105(7) 0.0238(2) Uani 1 1 d . . . 
N3 N 0.39278(11) 0.21094(8) 0.81811(6) 0.0178(2) Uani 1 1 d . . . 
N4 N 0.51134(12) 0.21877(9) 0.89331(6) 0.0258(2) Uani 1 1 d . . . 
N5 N 0.12317(11) 0.27062(8) 0.74405(6) 0.0177(2) Uani 1 1 d . . . 
N6 N 0.11245(11) 0.21412(8) 0.66598(6) 0.0202(2) Uani 1 1 d . . . 
N7 N 0.36236(14) 0.45594(10) 0.84621(7) 0.0282(3) Uani 1 1 d . . . 
C1 C 0.24564(15) 0.02300(10) 0.88673(8) 0.0229(3) Uani 1 1 d . . . 
C2 C 0.13667(16) -0.06284(11) 0.88976(8) 0.0289(3) Uani 1 1 d . . . 
C3 C -0.01203(16) -0.02082(11) 0.84198(9) 0.0284(3) Uani 1 1 d . . . 
C4 C 0.45517(14) 0.18091(10) 0.74743(7) 0.0211(3) Uani 1 1 d . . . 
C5 C 0.61936(14) 0.17257(11) 0.77676(8) 0.0237(3) Uani 1 1 d . . . 
C6 C 0.64717(14) 0.19619(11) 0.86702(8) 0.0261(3) Uani 1 1 d . . . 
C7 C 0.01600(13) 0.35936(10) 0.73516(8) 0.0204(3) Uani 1 1 d . . . 
C8 C -0.06267(14) 0.36265(11) 0.64852(8) 0.0224(3) Uani 1 1 d . . . 
C9 C 0.00112(14) 0.27090(10) 0.60871(7) 0.0213(3) Uani 1 1 d . . . 
C10 C 0.22246(13) 0.22452(9) 0.82577(7) 0.0174(2) Uani 1 1 d . . . 
C11 C 0.21387(13) 0.30359(10) 0.90259(7) 0.0184(2) Uani 1 1 d . . . 
C12 C 0.28447(14) 0.41390(10) 0.90795(7) 0.0211(3) Uani 1 1 d . . . 
C13 C 0.27338(15) 0.48270(11) 0.98082(8) 0.0256(3) Uani 1 1 d . . . 
C14 C 0.19245(15) 0.44550(11) 1.04371(8) 0.0281(3) Uani 1 1 d . . . 
C15 C 0.11964(14) 0.33813(11) 1.03685(8) 0.0256(3) Uani 1 1 d . . . 
C16 C 0.13180(13) 0.26797(10) 0.96679(7) 0.0210(3) Uani 1 1 d . . . 
H7NA H 0.3885(18) 0.5281(15) 0.8472(10) 0.031(4) Uiso 1 1 d . . . 
H7NB H 0.372(2) 0.4148(15) 0.8000(12) 0.042(4) Uiso 1 1 d . . . 
H1 H 0.3588(17) 0.0299(11) 0.9108(9) 0.020(3) Uiso 1 1 d . . . 
H2 H 0.1590(18) -0.1345(14) 0.9171(10) 0.034(4) Uiso 1 1 d . . . 
H3 H -0.1166(19) -0.0594(13) 0.8288(10) 0.034(4) Uiso 1 1 d . . . 
H4 H 0.3858(17) 0.1699(12) 0.6910(10) 0.028(4) Uiso 1 1 d . . . 
H5 H 0.6997(18) 0.1544(13) 0.7433(10) 0.032(4) Uiso 1 1 d . . . 
H6 H 0.7488(19) 0.1983(12) 0.9088(10) 0.031(4) Uiso 1 1 d . . . 
H7 H 0.0094(16) 0.4069(12) 0.7839(9) 0.022(3) Uiso 1 1 d . . . 
H8 H -0.1423(17) 0.4157(12) 0.6213(9) 0.026(3) Uiso 1 1 d . . . 
H9 H -0.0248(16) 0.2476(11) 0.5482(9) 0.021(3) Uiso 1 1 d . . . 
H13 H 0.3240(17) 0.5556(13) 0.9856(9) 0.026(3) Uiso 1 1 d . . . 
H14 H 0.1894(17) 0.4981(13) 1.0943(10) 0.032(4) Uiso 1 1 d . . . 
H15 H 0.0603(17) 0.3114(12) 1.0797(10) 0.029(4) Uiso 1 1 d . . . 
H16 H 0.0811(16) 0.1917(12) 0.9614(9) 0.022(3) Uiso 1 1 d . . . 
 
loop_ 
 _atom_site_aniso_label 
 _atom_site_aniso_U_11 
 _atom_site_aniso_U_22 
 _atom_site_aniso_U_33 
 _atom_site_aniso_U_23 
 _atom_site_aniso_U_13 
 _atom_site_aniso_U_12 
N1 0.0157(4) 0.0214(5) 0.0183(5) -0.0002(4) 0.0048(4) 0.0007(4) 
N2 0.0168(5) 0.0283(6) 0.0273(5) -0.0018(4) 0.0068(4) -0.0025(4) 
N3 0.0149(5) 0.0232(5) 0.0147(4) 0.0003(4) 0.0022(4) 0.0005(4) 
N4 0.0171(5) 0.0417(6) 0.0166(5) -0.0012(4) -0.0004(4) 0.0017(4) 
N5 0.0172(5) 0.0208(5) 0.0143(4) -0.0006(4) 0.0018(4) 0.0012(4) 
N6 0.0199(5) 0.0244(5) 0.0155(5) -0.0029(4) 0.0021(4) -0.0008(4) 
N7 0.0410(6) 0.0232(6) 0.0212(5) -0.0025(4) 0.0087(5) -0.0098(5) 
C1 0.0241(6) 0.0240(6) 0.0211(6) 0.0020(5) 0.0057(5) 0.0050(5) 
C2 0.0374(7) 0.0224(6) 0.0299(7) 0.0045(5) 0.0140(6) 0.0017(5) 
C3 0.0264(7) 0.0276(7) 0.0345(7) -0.0021(5) 0.0137(5) -0.0060(5) 
C4 0.0211(6) 0.0260(6) 0.0166(6) -0.0009(4) 0.0049(5) 0.0014(5) 
C5 0.0191(6) 0.0301(6) 0.0237(6) 0.0016(5) 0.0086(5) 0.0031(5) 
C6 0.0148(6) 0.0392(7) 0.0232(6) 0.0012(5) 0.0015(5) 0.0015(5) 
C7 0.0183(5) 0.0223(6) 0.0208(6) -0.0005(5) 0.0044(4) 0.0019(4) 
C8 0.0169(5) 0.0270(6) 0.0221(6) 0.0045(5) 0.0013(5) 0.0029(5) 
C9 0.0177(6) 0.0284(6) 0.0162(6) 0.0006(5) 0.0004(4) -0.0022(5) 
C10 0.0153(5) 0.0210(6) 0.0159(5) 0.0019(4) 0.0031(4) 0.0009(4) 
C11 0.0155(5) 0.0237(6) 0.0150(5) 0.0003(4) 0.0011(4) 0.0034(4) 
C12 0.0199(6) 0.0246(6) 0.0168(5) 0.0008(4) -0.0004(4) 0.0025(4) 
C13 0.0286(6) 0.0233(6) 0.0226(6) -0.0024(5) 0.0007(5) 0.0027(5) 
C14 0.0300(7) 0.0336(7) 0.0195(6) -0.0062(5) 0.0032(5) 0.0084(5) 
C15 0.0223(6) 0.0373(7) 0.0186(6) -0.0003(5) 0.0073(5) 0.0048(5) 
C16 0.0161(5) 0.0277(6) 0.0186(6) 0.0013(5) 0.0025(4) 0.0029(5) 
 
_geom_special_details 
; 
 All esds (except the esd in the dihedral angle between two l.s. planes) 
 are estimated using the full covariance matrix.  The cell esds are taken 
 into account individually in the estimation of esds in distances, angles 
 and torsion angles; correlations between esds in cell parameters are only 
 used when they are defined by crystal symmetry.  An approximate (isotropic) 
 treatment of cell esds is used for estimating esds involving l.s. planes. 
; 
 
loop_ 
 _geom_bond_atom_site_label_1 
 _geom_bond_atom_site_label_2 
 _geom_bond_distance 
 _geom_bond_site_symmetry_2 
 _geom_bond_publ_flag 
N1 C1 1.3543(15) . ? 
N1 N2 1.3575(13) . ? 
N1 C10 1.4744(14) . ? 
N2 C3 1.3310(17) . ? 
N3 C4 1.3631(15) . ? 
N3 N4 1.3642(13) . ? 
N3 C10 1.4763(14) . ? 
N4 C6 1.3248(16) . ? 
N5 C7 1.3621(15) . ? 
N5 N6 1.3657(13) . ? 
N5 C10 1.4615(14) . ? 
N6 C9 1.3216(15) . ? 
N7 C12 1.3668(16) . ? 
N7 H7NA 0.871(17) . ? 
N7 H7NB 0.882(18) . ? 
C1 C2 1.3678(18) . ? 
C1 H1 0.949(14) . ? 
C2 C3 1.3991(19) . ? 
C2 H2 0.939(16) . ? 
C3 H3 0.972(16) . ? 
C4 C5 1.3638(17) . ? 
C4 H4 0.950(15) . ? 
C5 C6 1.3970(17) . ? 
C5 H5 0.963(15) . ? 
C6 H6 0.955(16) . ? 
C7 C8 1.3641(17) . ? 
C7 H7 0.951(14) . ? 
C8 C9 1.4017(17) . ? 
C8 H8 0.943(15) . ? 
C9 H9 0.956(14) . ? 
C10 C11 1.5226(15) . ? 
C11 C16 1.3960(16) . ? 
C11 C12 1.4136(17) . ? 
C12 C13 1.4073(17) . ? 
C13 C14 1.3788(19) . ? 
C13 H13 0.948(15) . ? 
C14 C15 1.3897(19) . ? 
C14 H14 1.001(16) . ? 
C15 C16 1.3833(17) . ? 
C15 H15 0.968(15) . ? 
C16 H16 0.984(14) . ? 
 
loop_ 
 _geom_angle_atom_site_label_1 
 _geom_angle_atom_site_label_2 
 _geom_angle_atom_site_label_3 
 _geom_angle 
 _geom_angle_site_symmetry_1 
 _geom_angle_site_symmetry_3 
 _geom_angle_publ_flag 
C1 N1 N2 112.50(10) . . ? 
C1 N1 C10 126.57(10) . . ? 
N2 N1 C10 120.21(9) . . ? 
C3 N2 N1 103.76(10) . . ? 
C4 N3 N4 111.49(9) . . ? 
C4 N3 C10 130.32(9) . . ? 
N4 N3 C10 117.91(9) . . ? 
C6 N4 N3 104.16(9) . . ? 
C7 N5 N6 111.34(9) . . ? 
C7 N5 C10 127.56(9) . . ? 
N6 N5 C10 120.46(9) . . ? 
C9 N6 N5 104.73(9) . . ? 
C12 N7 H7NA 119.6(10) . . ? 
C12 N7 H7NB 121.3(11) . . ? 
H7NA N7 H7NB 118.3(15) . . ? 
N1 C1 C2 106.64(11) . . ? 
N1 C1 H1 121.0(8) . . ? 
C2 C1 H1 132.4(8) . . ? 
C1 C2 C3 104.86(11) . . ? 
C1 C2 H2 126.8(9) . . ? 
C3 C2 H2 128.3(9) . . ? 
N2 C3 C2 112.21(11) . . ? 
N2 C3 H3 119.7(9) . . ? 
C2 C3 H3 128.0(9) . . ? 
N3 C4 C5 107.03(10) . . ? 
N3 C4 H4 120.6(8) . . ? 
C5 C4 H4 132.4(8) . . ? 
C4 C5 C6 104.84(10) . . ? 
C4 C5 H5 128.2(9) . . ? 
C6 C5 H5 126.9(9) . . ? 
N4 C6 C5 112.46(10) . . ? 
N4 C6 H6 119.6(9) . . ? 
C5 C6 H6 127.9(9) . . ? 
N5 C7 C8 106.87(10) . . ? 
N5 C7 H7 121.1(8) . . ? 
C8 C7 H7 132.0(8) . . ? 
C7 C8 C9 105.23(10) . . ? 
C7 C8 H8 127.3(8) . . ? 
C9 C8 H8 127.5(8) . . ? 
N6 C9 C8 111.80(10) . . ? 
N6 C9 H9 119.6(8) . . ? 
C8 C9 H9 128.6(8) . . ? 
N5 C10 N1 107.58(9) . . ? 
N5 C10 N3 110.64(8) . . ? 
N1 C10 N3 106.52(8) . . ? 
N5 C10 C11 109.90(9) . . ? 
N1 C10 C11 112.09(9) . . ? 
N3 C10 C11 110.03(9) . . ? 
C16 C11 C12 119.86(10) . . ? 
C16 C11 C10 119.68(10) . . ? 
C12 C11 C10 120.44(10) . . ? 
N7 C12 C13 119.08(11) . . ? 
N7 C12 C11 123.16(11) . . ? 
C13 C12 C11 117.76(11) . . ? 
C14 C13 C12 121.35(12) . . ? 
C14 C13 H13 120.8(8) . . ? 
C12 C13 H13 117.9(9) . . ? 
C13 C14 C15 120.59(11) . . ? 
C13 C14 H14 117.6(9) . . ? 
C15 C14 H14 121.8(9) . . ? 
C16 C15 C14 119.12(11) . . ? 
C16 C15 H15 119.2(9) . . ? 
C14 C15 H15 121.7(9) . . ? 
C15 C16 C11 121.27(12) . . ? 
C15 C16 H16 119.9(8) . . ? 
C11 C16 H16 118.9(8) . . ? 
 
loop_ 
 _geom_torsion_atom_site_label_1 
 _geom_torsion_atom_site_label_2 
 _geom_torsion_atom_site_label_3 
 _geom_torsion_atom_site_label_4 
 _geom_torsion 
 _geom_torsion_site_symmetry_1 
 _geom_torsion_site_symmetry_2 
 _geom_torsion_site_symmetry_3 
 _geom_torsion_site_symmetry_4 
 _geom_torsion_publ_flag 
C1 N1 N2 C3 -1.72(12) . . . . ? 
C10 N1 N2 C3 -172.62(10) . . . . ? 
C4 N3 N4 C6 1.65(13) . . . . ? 
C10 N3 N4 C6 176.19(10) . . . . ? 
C7 N5 N6 C9 1.68(12) . . . . ? 
C10 N5 N6 C9 173.19(9) . . . . ? 
N2 N1 C1 C2 1.66(13) . . . . ? 
C10 N1 C1 C2 171.86(10) . . . . ? 
N1 C1 C2 C3 -0.86(13) . . . . ? 
N1 N2 C3 C2 1.13(13) . . . . ? 
C1 C2 C3 N2 -0.19(14) . . . . ? 
N4 N3 C4 C5 -1.98(13) . . . . ? 
C10 N3 C4 C5 -175.64(11) . . . . ? 
N3 C4 C5 C6 1.42(14) . . . . ? 
N3 N4 C6 C5 -0.71(15) . . . . ? 
C4 C5 C6 N4 -0.45(15) . . . . ? 
N6 N5 C7 C8 -1.87(13) . . . . ? 
C10 N5 C7 C8 -172.63(10) . . . . ? 
N5 C7 C8 C9 1.25(13) . . . . ? 
N5 N6 C9 C8 -0.85(13) . . . . ? 
C7 C8 C9 N6 -0.25(14) . . . . ? 
C7 N5 C10 N1 112.16(12) . . . . ? 
N6 N5 C10 N1 -57.85(12) . . . . ? 
C7 N5 C10 N3 -131.85(11) . . . . ? 
N6 N5 C10 N3 58.14(13) . . . . ? 
C7 N5 C10 C11 -10.14(15) . . . . ? 
N6 N5 C10 C11 179.85(9) . . . . ? 
C1 N1 C10 N5 157.09(10) . . . . ? 
N2 N1 C10 N5 -33.40(12) . . . . ? 
C1 N1 C10 N3 38.42(14) . . . . ? 
N2 N1 C10 N3 -152.06(9) . . . . ? 
C1 N1 C10 C11 -81.98(13) . . . . ? 
N2 N1 C10 C11 87.54(11) . . . . ? 
C4 N3 C10 N5 -35.14(15) . . . . ? 
N4 N3 C10 N5 151.53(9) . . . . ? 
C4 N3 C10 N1 81.51(13) . . . . ? 
N4 N3 C10 N1 -91.83(11) . . . . ? 
C4 N3 C10 C11 -156.78(11) . . . . ? 
N4 N3 C10 C11 29.89(13) . . . . ? 
N5 C10 C11 C16 110.16(11) . . . . ? 
N1 C10 C11 C16 -9.42(14) . . . . ? 
N3 C10 C11 C16 -127.76(10) . . . . ? 
N5 C10 C11 C12 -68.08(12) . . . . ? 
N1 C10 C11 C12 172.34(9) . . . . ? 
N3 C10 C11 C12 54.00(13) . . . . ? 
C16 C11 C12 N7 -177.98(11) . . . . ? 
C10 C11 C12 N7 0.24(17) . . . . ? 
C16 C11 C12 C13 2.15(16) . . . . ? 
C10 C11 C12 C13 -179.62(10) . . . . ? 
N7 C12 C13 C14 178.29(11) . . . . ? 
C11 C12 C13 C14 -1.85(17) . . . . ? 
C12 C13 C14 C15 0.21(18) . . . . ? 
C13 C14 C15 C16 1.14(18) . . . . ? 
C14 C15 C16 C11 -0.80(17) . . . . ? 
C12 C11 C16 C15 -0.87(17) . . . . ? 
C10 C11 C16 C15 -179.11(10) . . . . ? 
 
loop_ 
 _geom_hbond_atom_site_label_D 
 _geom_hbond_atom_site_label_H 
 _geom_hbond_atom_site_label_A 
 _geom_hbond_distance_DH 
 _geom_hbond_distance_HA 
 _geom_hbond_distance_DA 
 _geom_hbond_angle_DHA 
 _geom_hbond_site_symmetry_A 
N7 H7NB N3  0.882(18) 2.398(17) 2.9129(15) 117.5(13) . 
N7 H7NB N5  0.882(18) 2.682(17) 3.1413(15) 113.7(13) . 
N7 H7NA N6  0.871(17) 2.181(17) 3.0302(15) 165.1(14) 2_556 
 
_diffrn_measured_fraction_theta_max    0.969 
_diffrn_reflns_theta_full              67.11 
_diffrn_measured_fraction_theta_full   0.969 
_refine_diff_density_max    0.199 
_refine_diff_density_min   -0.178 
_refine_diff_density_rms    0.031 
